# Supplementary material for: Nano-Graphene Oxide Functionalized Bioactive Poly(lactic acid) and Poly(ε-caprolactone) Nanofibrous Scaffolds
Source: PubMed Central journal article supplement (PMC5951450; doi:10.3390/ma11040566), 2018-04-06
Supplement: materials-11-00566-s001.pdf [file materials-11-00566-s001.pdf]

## Supplementary information

# Nano-Graphene Oxide Functionalized Bioactive Poly(lactic acid) and Poly( $\epsilon$ -caprolactone) Nanofibrous Scaffolds

Duo Wu <sup>1</sup>, Archana Samanta <sup>2</sup>, Rajiv K. Srivastava <sup>2</sup> and Minna Hakkarainen <sup>1,\*</sup>

<sup>1</sup> Department of Fibre and Polymer Technology, KTH Royal Institute of Technology, SE-100 44 Stockholm, Sweden; duowu@kth.se

<sup>2</sup> Department of Textile Technology, Indian Institute of Technology Delhi, Hauz Khas, New Delhi 110016, India; p.archana.iitd@gmail.com (A.S.); rajiv@textile.iitd.ac.in (R.K.S.)

\* Correspondence: minna@kth.se; Tel.: +46-8-790-8271

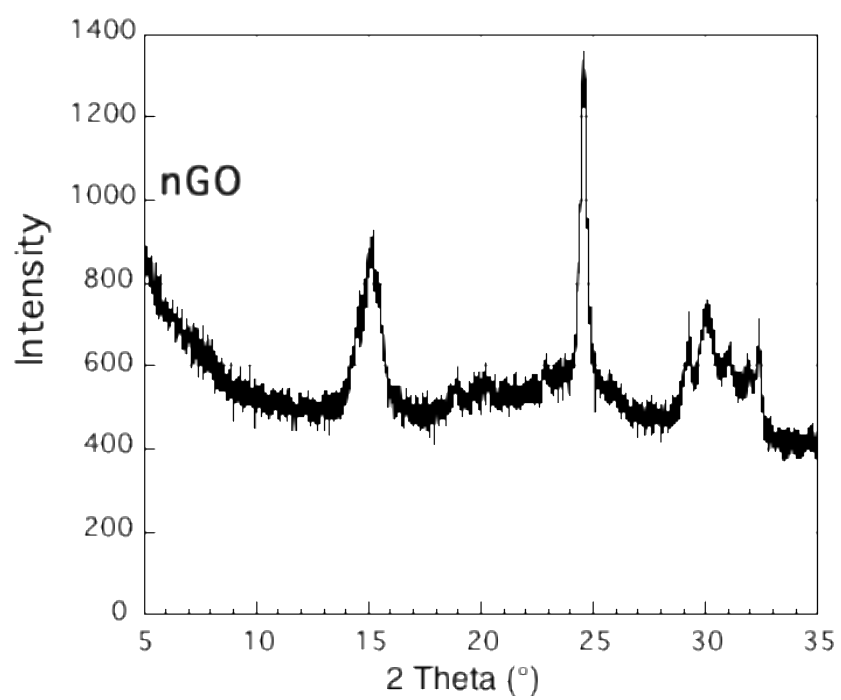

Figure S1. XRD spectrum of nGO

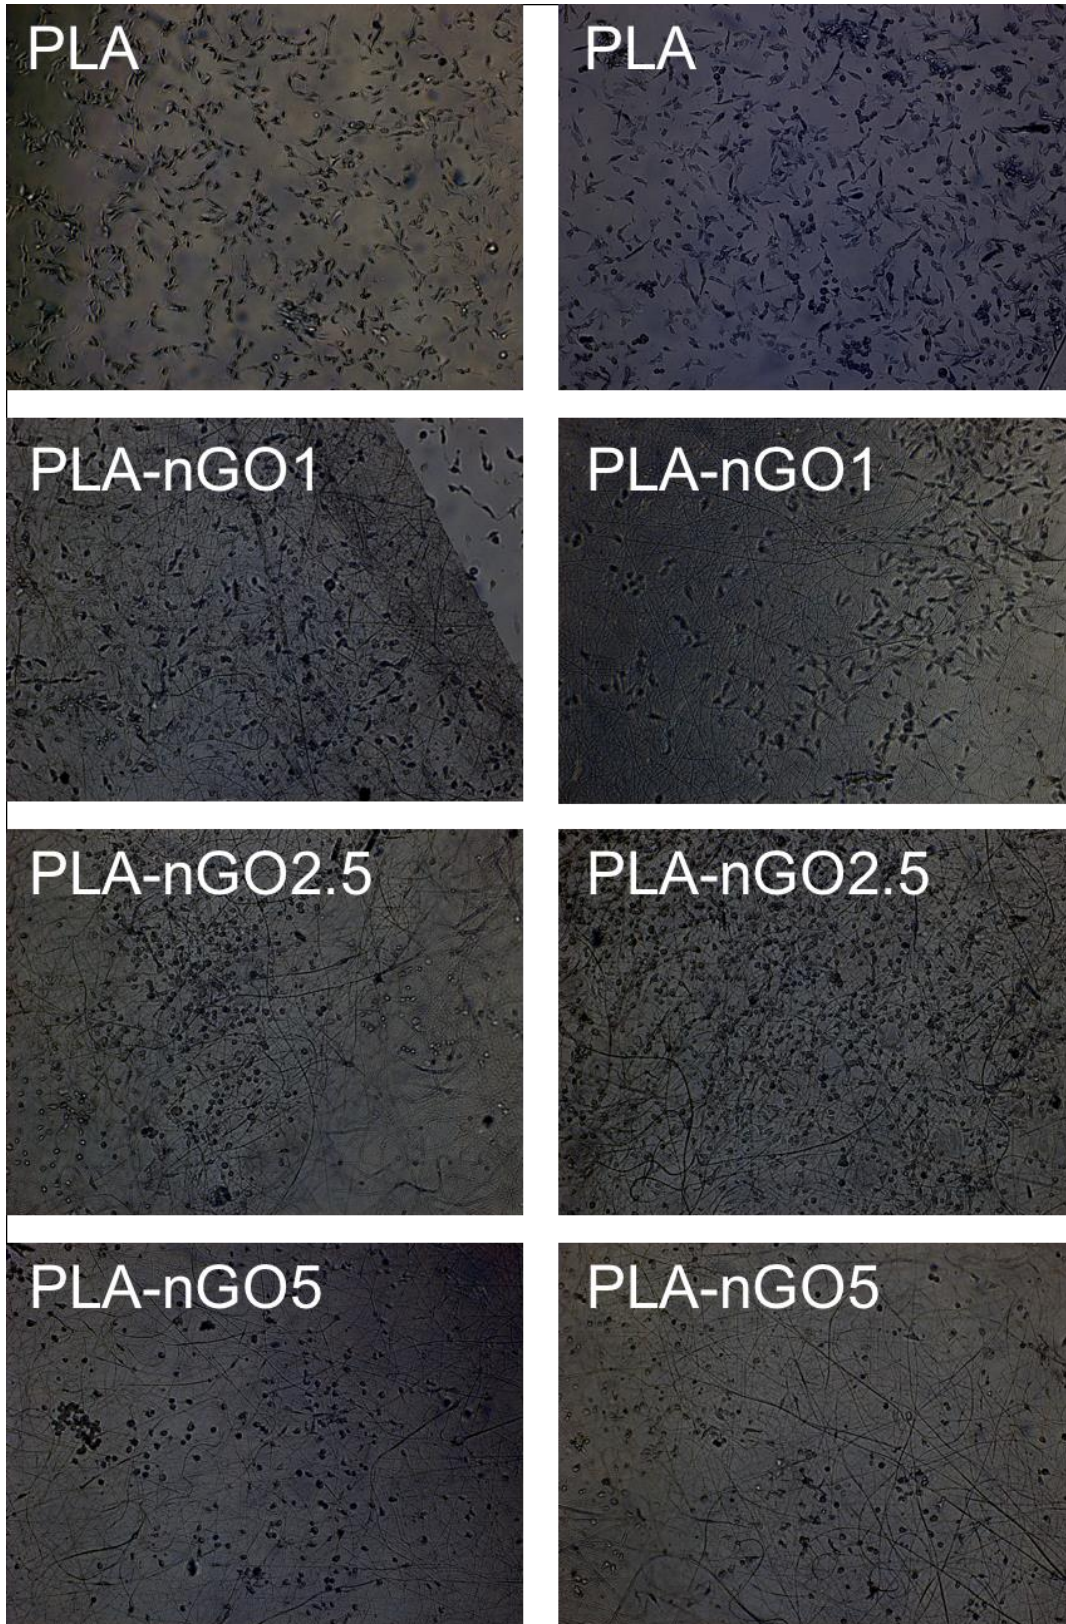

Figure S2. Optimal images MG63 cells on the PLA, PLA-nGO1, PLA-nGO2.5 and PLA-nGO5 after 4 days of culture.

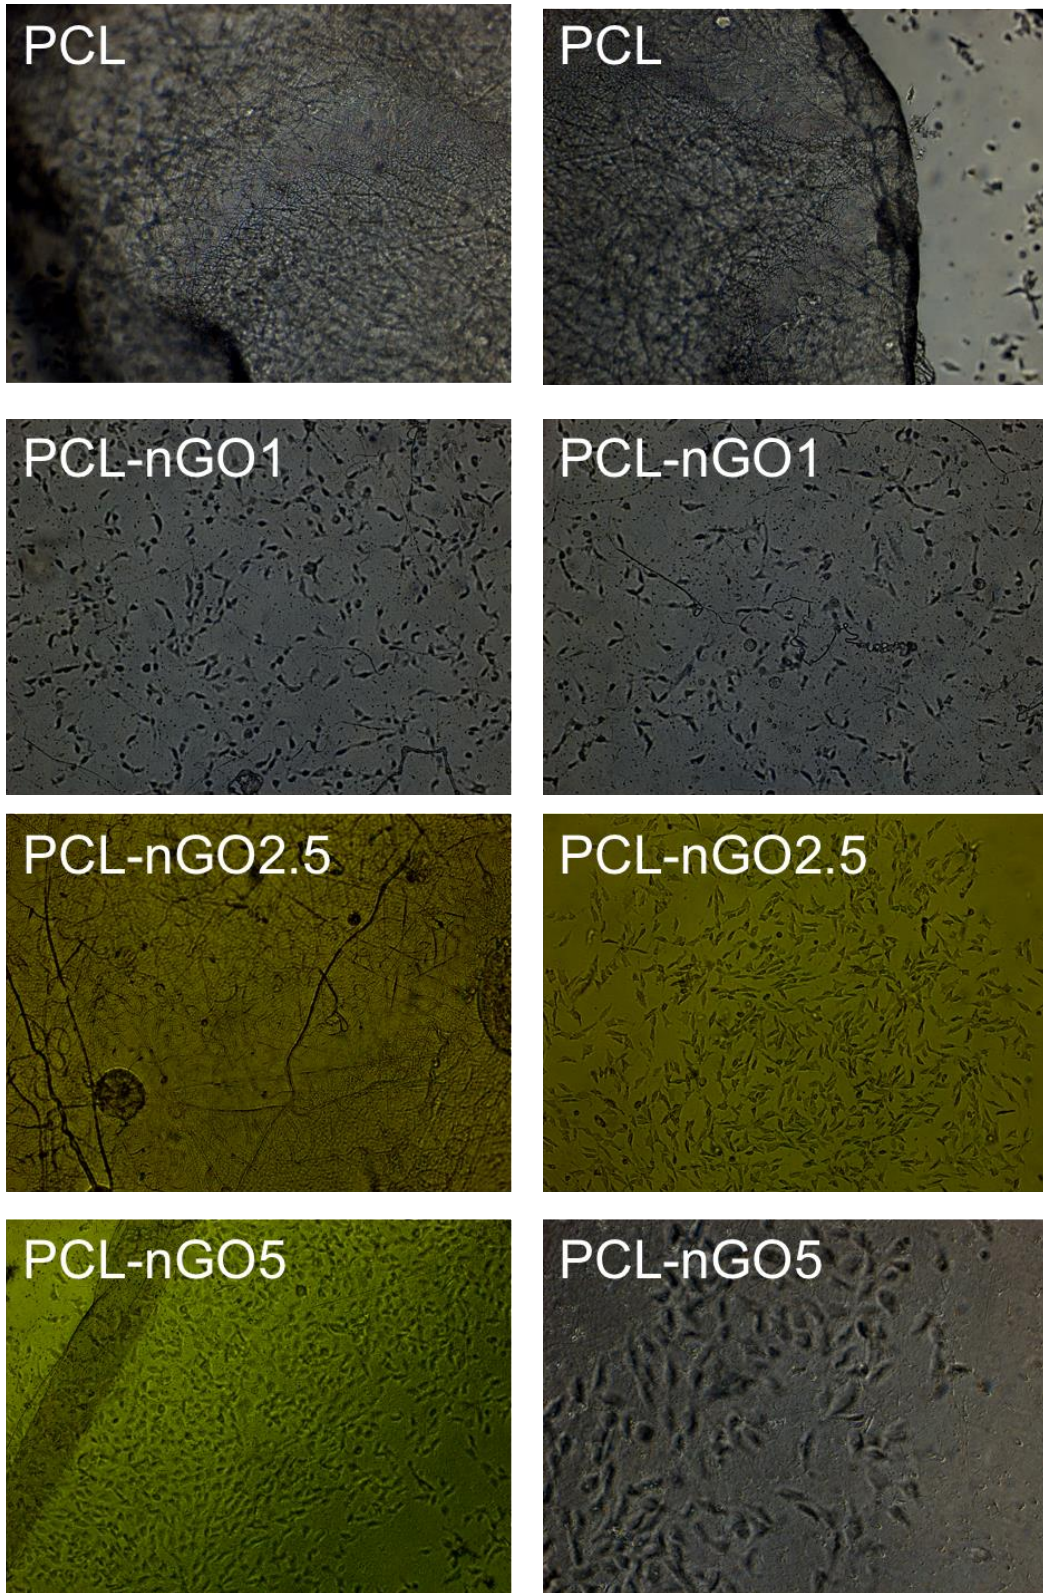

Figure S3. Optimal images MG63 cells on the PCL, PCL-nGO1, PCL-nGO2.5 and PCL-nGO5 after 4 days of culture.
